# Supplementary material
Source: PubMed Central journal article supplement (PMC10644384)
Supplement: NIHMS1909608-supplement-1.pdf [file NIHMS1909608-supplement-1.pdf]

A

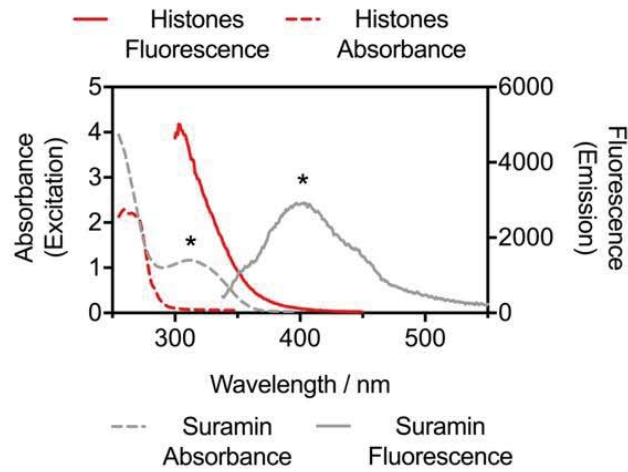

B

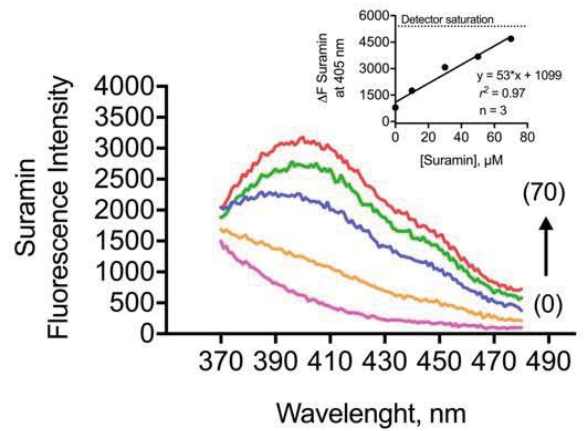

- 1 **Supplemental Figure 1.** Emission (—) and excitation (---) spectra of suramin (\*) and histones in  
 2 HEPES buffer (pH 7.4).  $\lambda_{\text{exc}} = 315$  nm and  $\lambda_{\text{em}} = 405$  nm were used for the emission and excitation  
 3 scan, respectively, of suramin fluorescence, whereas  $\lambda_{\text{exc}} = 278$  nm and  $\lambda_{\text{em}} = 305$  nm were used for  
 4 the emission and excitation scan, respectively, of histones. (A) Dual plot of both histones and  
 5 suramin fluorescence and absorbance. (B) Suramin intrinsic fluorescence intensity in solution from  
 6 0 (0) to 70 μM (70).

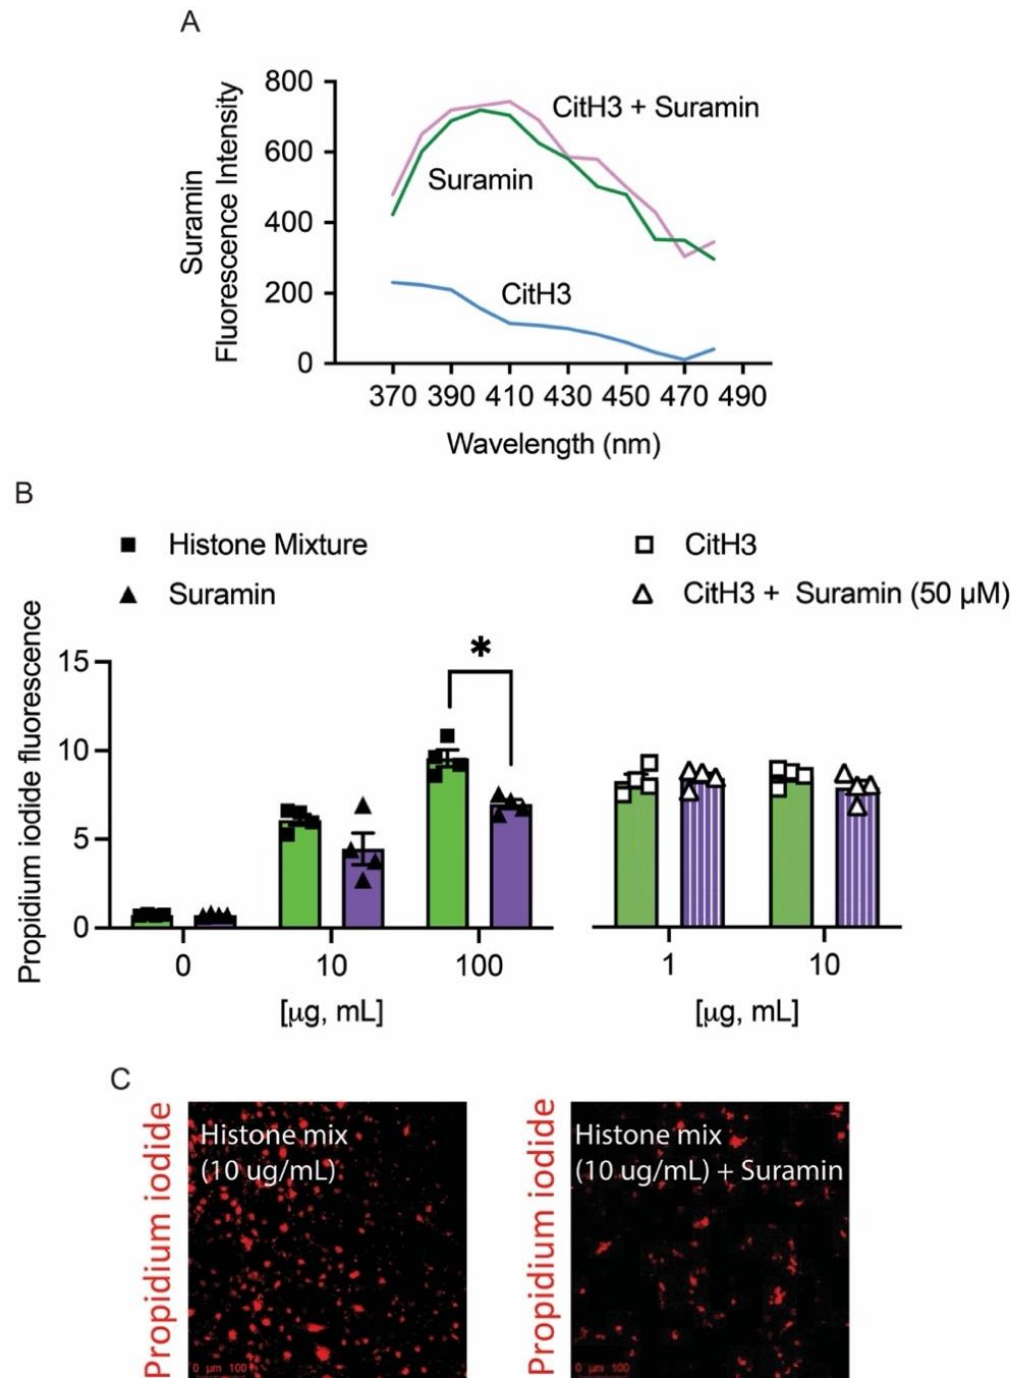

**Supplemental Figure 2.** Suramin does not bind to citrullinated histone H3. (A) *In vitro* fluorescentspectroscopy studies were used to biochemically establish the interaction between suramin (50  $\mu$ M) and citrullinated histone H3 (1  $\mu$ g/mL). (B) Lung mouse microvascular endothelial cell death induced by histones (1, 10 and 100  $\mu$ g/mL) and citrullinated histone H3 (1 and 10  $\mu$ g/mL) assessed by PI staining (n=4). Two-way ANOVA with Bonferroni's correction for multiple comparisons;  $P < 0.05$ . (C) Representative confocal images of PI staining of Lung mouse microvascular endothelial cells exposed to histone mixture and histones + suramin.

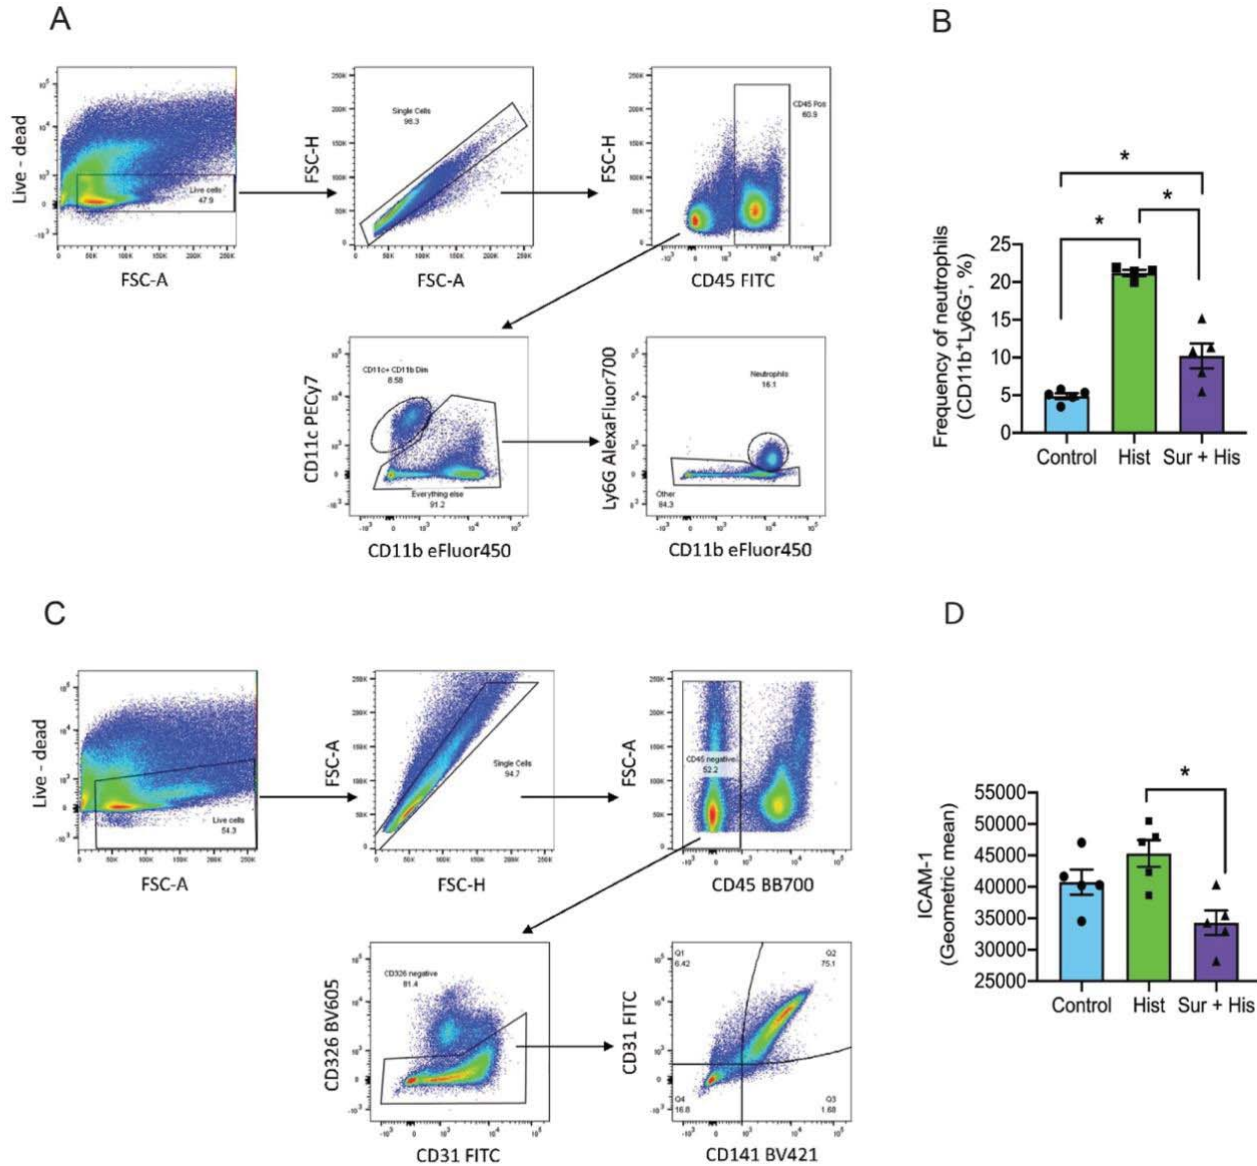

**Supplemental Figure 3.** Histone-induced neutrophil recruitment and adhesion molecule expression is blocked by suramin. (A) Live cells were gated and doublets excluded (FSC-A vs FSC-H). CD45<sup>+</sup> cells were selected and CD11c<sup>-</sup> cells identified. Neutrophils (CD11b<sup>+</sup>Ly6G<sup>+</sup>) were identified, and the frequency of neutrophils per live cells determined. (B) Summary data of the frequency of neutrophil levels in lung tissue 4 hours after saline (Control; 300  $\mu$ L;  $4.8 \pm 0.4$  frequency;  $n=5$ ), histones (Hist; 45 mg/Kg;  $21 \pm 0.4$  frequency;  $n=4$ ), or suramin (50 mg/Kg) and histone injection (Sur+His;  $10 \pm 1.6$  frequency;  $n=5$ ). (C) Live cells were gated and doublets excluded (FSC-H vs FSC-A). CD45<sup>-</sup> cells were selected and CD31<sup>+</sup>CD326<sup>-</sup> cells identified. Endothelial cells (CD31<sup>+</sup>CD141<sup>+</sup>, Q2) were assessed for CD54 expression (geometric mean intensity). (D) Summary data for endothelial ICAM-1 (CD54) expression geometric means (GM) in lung tissue 4 hours after saline (Control;  $40743 \pm 1999$  GM;  $n=5$ ), histones (Hist; 45 mg/Kg;  $45314 \pm 2126$  GM;  $n=5$ ), or suramin (50 mg/Kg) and histone injection (Sur+His;  $34288 \pm 1957$  GM;  $n=5$ ). Data are expressed as mean  $\pm$  SEM. Two-way ANOVA with Bonferroni's correction for multiple comparisons;  $P < 0.05$ . A new biological replicate culture well was used for each group.

A

Saline

Suramin

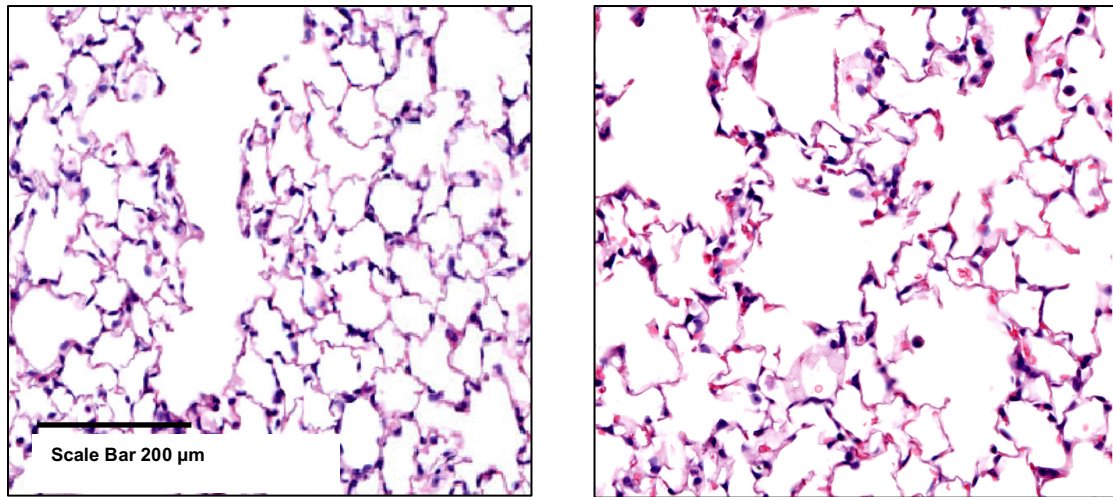

B

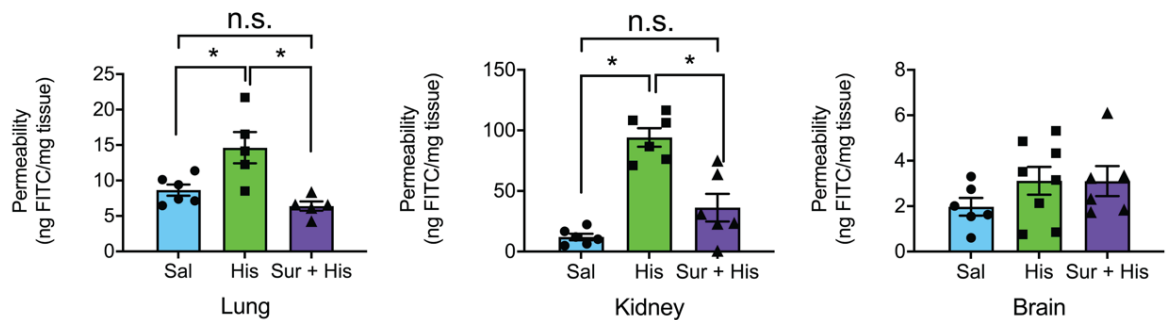

**Supplemental Figure 4.** (A) Representative images of hematoxylin and eosin stain (H&E) of a histological section of paraffin-embedded fixed lung tissue from mice treated with saline or suramin. The dark blue color denotes cell nuclei, light pink extracellular matrix, and the red erythrocytes. Scale bar = 200  $\mu$ m. (B) Summary data for FITC-dextran extravasation using the modified Mile's Assay in lung, kidney, and brain tissue from saline (control), histones (45 mg/Kg) and suramin (50 mg/Kg) and histone (Sur+His) injected mice at 4 hr. Lung permeability in saline (control;  $8.7 \pm 0.8$  ng FITC/mg tissue;  $n=6$ ), histones (His;  $14.6 \pm 2.2$  ng FITC/mg tissue;  $n=5$ ), and suramin and histone (Sur+His;  $6.4 \pm 0.7$  ng FITC/mg tissue;  $n=5$ ) injected mice. Kidney permeability in saline (control;  $12 \pm 2.7$  ng FITC/mg tissue;  $n=6$ ), histones (His;  $94 \pm 7.7$  ng FITC/mg tissue;  $n=6$ ), and suramin and histone (Sur+His;  $36 \pm 11$  ng FITC/mg tissue;  $n=6$ ) injected mice. Brain permeability in saline (control;  $1.9 \pm 0.4$  ng FITC/mg tissue;  $n=6$ ), histones (His;  $3.1 \pm 0.6$  ng FITC/mg tissue;  $n=6$ ), and suramin and histone (Sur+His;  $3.1 \pm 0.6$  ng FITC/mg tissue;  $n=6$ ) injected mice. Data are expressed as mean  $\pm$  SEM. Two-way ANOVA with Bonferroni's correction for multiple comparisons;  $P < 0.05$ . A new biological replicate culture well was used for each group.
